# Supplementary material for: The impact of COVID-19 critical illness on new disability, functional outcomes and return to work at 6 months: a prospective cohort study
Source: Crit Care. 2021 Nov 8;25:382. doi: 10.1186/s13054-021-03794-0 (PMC8575157; doi:10.1186/s13054-021-03794-0)

# ONLINE SUPPLEMENT

## The Impact of COVID-19 Critical Illness on Disability, Functional Outcomes and Return to Work at 6 Months

The COVID-Recovery Study Investigators and the ANZICS Clinical Trials Group

The COVID-Recovery Study Investigators and the ANZICS Clinical Trials Group

Carol L. Hodgson, PhD<sup>1,2,3</sup>; Alisa M. Higgins, PhD<sup>1</sup>; Michael J. Bailey, PhD<sup>1</sup>; Anne M. Mather, BBiomed(Hons)<sup>1</sup>; Lisa Beach, MPhysio(Cardio)<sup>3</sup>; Rinaldo Bellomo, PhD<sup>1,11,26</sup>; Bernie Bissett, PhD<sup>6,7</sup>; Ianthe J. Boden, PhD<sup>8,9</sup>; Scott Bradley, PhD<sup>3</sup>; Aidan Burrell, PhD<sup>1,2</sup>; D. James Cooper, MD<sup>1,2</sup>; Bentley J. Fulcher, BBiomedSC(PharmSc)(Hons)<sup>1</sup>; Kimberley J. Haines, PhD<sup>10,11</sup>; Jack Hopkins<sup>1</sup>; Alice Y.M. Jones, PhD<sup>12</sup>; Stuart Lane, PhD<sup>1,13</sup>; Drew Lawrence, BPhy<sup>3</sup>; Lisa van der Lee, PhD<sup>14</sup>; Jennifer Liacos, BPhy(Hons)<sup>1,3</sup>; Natalie J. Linke, BN<sup>1</sup>; Lonni Marques Gomes, BAccMgt<sup>1</sup>; Marc Nickels, PhD<sup>15</sup>; George Ntoumenopoulos, PhD<sup>16</sup>; Paul S. Myles, DSc<sup>17</sup>; Shane Patman, PhD<sup>18</sup>; Michelle Paton, MPhy<sup>1,19</sup>; Gemma Pound, BSc(Pty)(Hons)<sup>1,20</sup>; Sumeet Rai, MBBS<sup>21,22</sup>; Alana Rix, BPhysio(Hons)<sup>3</sup>; Thomas C. Rollinson, BPhysio(Hons)<sup>23,24</sup>; Janani Sivasuthan, MPH<sup>1</sup>; Claire J. Tipping, PhD<sup>3</sup>; Peter Thomas, PhD<sup>25</sup>; Tony Trapani, BEmergHealth(Pmed)<sup>1</sup>; Andrew A. Udy, PhD<sup>1,2</sup>; Christina Whitehead, MBioethics<sup>1,13</sup>; Shannah Anderson (consumer representative); Ary Serpa Neto, PhD<sup>1,5,26,27</sup>

### Affiliations

<sup>1</sup> Australian and New Zealand Intensive Care Research Centre, School of Public Health and Preventive Medicine, Monash University, Melbourne, Victoria, Australia

<sup>2</sup> Department of Intensive Care and Hyperbaric Medicine, The Alfred, Melbourne, Victoria, Australia

<sup>3</sup> Department of Physiotherapy, The Alfred, Melbourne, Victoria, Australia

- <sup>4</sup> Department of Physiotherapy (Allied Health), The Royal Melbourne Hospital, Melbourne, Victoria, Australia
- <sup>5</sup> Department of Critical Care, School of Medicine, University of Melbourne, Victoria, Australia
- <sup>6</sup> Discipline of Physiotherapy, University of Canberra, Canberra, Australia
- <sup>7</sup> Physiotherapy Department, Canberra Hospital, Canberra, Australia
- <sup>8</sup> Physiotherapy Department Launceston General Hospital, Launceston, Australia
- <sup>9</sup> Launceston Clinical School, University of Tasmania, Tasmania, Australia
- <sup>9</sup> Faculty of Medicine, Nursing and Health Sciences, Monash University, Melbourne, Victoria, Australia
- <sup>10</sup> Physiotherapy Department, Western Health, Melbourne, Victoria, Australia
- <sup>11</sup> Department of Critical Care, School of Medicine, University of Melbourne, Melbourne, Victoria, Australia
- <sup>12</sup> School of Health and Rehabilitation Sciences, University of Queensland, Brisbane, Australia
- <sup>13</sup> Intensive Care Medicine Nepean Hospital, New South Wales, Australia
- <sup>14</sup> Fiona Stanley Hospital, Perth, Western Australia, Australia
- <sup>15</sup> Physiotherapy Department, Princess Alexandra Hospital, Metro South Health, Queensland, Australia
- <sup>16</sup> Physiotherapy, St Vincent's Hospital, Sydney, New South Wales, Australia
- <sup>17</sup> Department of Anaesthesiology and Perioperative Medicine, Central Clinical School, Monash University, Melbourne, Victoria, Australia
- <sup>18</sup> Faculty of Medicine, Nursing and Midwifery, Health Sciences and Physiotherapy, The University of Notre Dame Australia, Perth, Australia
- <sup>19</sup> Department of Physiotherapy, Monash Health, Melbourne, Victoria, Australia
- <sup>20</sup> Physiotherapy Department, St Vincent's Hospital, Melbourne, Victoria, Australia

<sup>21</sup>Canberra Health Services, Canberra, Australia

<sup>22</sup>Medical School, Australia National University, Canberra, Australia

<sup>23</sup>Department of Physiotherapy, Division of Allied Health, Austin Health, Melbourne, Australia

<sup>24</sup>Department of Physiotherapy, The University of Melbourne, Melbourne, Australia

<sup>25</sup>Department of Physiotherapy, Royal Brisbane and Women's Hospital, Brisbane, Australia

<sup>26</sup>Data Analytics Research and Evaluation (DARE) Centre, Austin Hospital, Melbourne, Australia

<sup>27</sup>Department of Critical Care Medicine, Hospital Israelita Albert Einstein, Sao Paulo, Brazil

**Corresponding author:**

Professor Carol Hodgson

Australian and New Zealand Intensive Care Research Centre, Monash University

553 St Kilda Rd, Melbourne, Australia 3004

Email: [carol.hodgson@monash.edu](mailto:carol.hodgson@monash.edu)

## Table of Contents

|                                                                                                                              |                                     |
|------------------------------------------------------------------------------------------------------------------------------|-------------------------------------|
| <b>ADDITIONAL METHODS .....</b>                                                                                              | <b>5</b>                            |
| <b>eTable 1 - Sites Participating in the Study.....</b>                                                                      | <b>10</b>                           |
| <b>eTable 2 - Measurement Tools Used at 6-Month Follow-Up .....</b>                                                          | <b>11</b>                           |
| <b>eTable 3 - Baseline Characteristics and Clinical Outcomes of the Included Patients According to 6-Month Outcome .....</b> | <b>12</b>                           |
| <b>eTable 4 - Interventions and Development of Complications in the Included Patients.....</b>                               | <b>14</b>                           |
| <b>eTable 5 - Interventions and Development of Complications in the Included Patients According to 6-Month Outcome .....</b> | <b>15</b>                           |
| <b>eTable 7 - Univariable Analyses of Factors Associated with Development of New Disability or Death at 6 Months.....</b>    | <b>18</b>                           |
| <b>eFigure 1 - Roadmap of Restrictions in Australia During the 2020 COVID-19 Pandemic.....</b>                               | <b>20</b>                           |
| <b>eFigure 2 - Study Flowchart.....</b>                                                                                      | <b>Error! Bookmark not defined.</b> |
| <b>eFigure 3 - Persistent Symptoms at 6 Months.....</b>                                                                      | <b>Error! Bookmark not defined.</b> |

## ADDITIONAL METHODS

### *Roadmap of restrictions in Australia*

The following restrictions were applied in Australia (available in [https://www1.health.gov.au/internet/main/publishing.nsf/Content/novel\\_coronavirus\\_2019\\_ncov\\_weekly\\_epidemiology\\_reports\\_australia\\_2020.htm](https://www1.health.gov.au/internet/main/publishing.nsf/Content/novel_coronavirus_2019_ncov_weekly_epidemiology_reports_australia_2020.htm)):

1. **25 January 2020:** First confirmed COVID-19 case reported in Australia;
2. **01 February 2020:** Travel restrictions on foreign travelers coming from mainland China implemented;
3. **05 February 2020:** Limited local transmission within a cluster first reported in Australia;
4. **01 March 2020:** First COVID-19 death reported in Australia and travel restrictions on foreign travelers coming from Islamic Republic of Iran implemented;
5. **05 March 2020:** Restrictions on travelers from Republic of Korea;
6. **08 March 2020:** Recommended restrictions on COVID-19 contacts and travelers from listed higher risk countries;
7. **11 March 2020:** Restrictions on travelers from Italy;
8. **15 March 2020:** All overseas arrivals required to self-quarantine for 14 days and cruise ship arrivals banned;
9. **16 March 2020:** Non-essential static gatherings of >500 people banned;
10. **18 March 2020:** Restrictions on indoor gatherings;
11. **20 March 2020:** Travel ban on foreign nationals entering Australia and restriction on travel to remote communities (borders closed);
12. **21 March 2020:** Select states and territories close borders to non-essential travel;

13. **23 March 2020:** Scale up of social distancing measures (stage 1 lockdown);
14. **25 March 2020:** Scale up of social distancing measures (stage 2 lockdown);
15. **28 March 2020:** All people entering Australia required to undertake a mandatory 14-day quarantine at designated facilities (e.g., hotels) in their port of arrival;
16. **29 March 2020:** Public gatherings limited to two persons (stage 3 lockdown);
17. **27 April 2020:** Start of easing restrictions in selected states and territories;
18. **08 May 2020:** Government announced three-step plan to ease COVID-19 restrictions (implementation to vary in states and territories);
19. **05 June 2020:** Western Australia and Northern Territory commenced step 3 easing of restrictions;
20. **01 July 2020:** Victoria implements lockdowns on 'hotspot' suburbs and State of Emergency;
21. **08 July 2020:** New South Wales and Victoria border closes, and stage 3 lockdown of Melbourne and Mitchell Shire;
22. **19 July 2020:** Use of masks is compulsory in Victoria;
23. **02 August 2020:** Stage 4 restrictions for metropolitan Melbourne and stage 3 restrictions for regional Victoria and State of Disaster declared in Victoria;
24. **13 September 2020:** Victoria commenced easing of restrictions against the 'roadmap to reopening';

25. **16 October 2020:** Select states and territories commence opening for quarantine free travel from New Zealand; and

26. **18 October 2020:** Further easing of restrictions in Victoria.

### *Definition of stage lockdowns*

#### Stage 3 lockdown

1. Stay at home order (leave only for shopping food or essential items, medical care and caregiving, work and study [if you can't do from home] and exercise [but don't leave or enter restricted areas]);
2. No private visitors and public gathering of up to 2 people only;
3. Work from home;
4. Remote learning;
5. Community sport, indoor sport, swimming pools, playcenters and playgrounds closed;
6. Restaurants, bars and pubs for take away and delivery only;
7. Saunas and personal care services closed;
8. Weddings up to 5 people and funerals up to 10 people;
9. Galleries, cinemas, concert venues, libraries, museums, casinos and stadiums closed.

#### Stage 4 lockdown

In addition to the points described above for the stage 3 lockdown:

1. Curfew from 8PM to 5AM;
2. Night Network suspended and public transport services reduced during curfew hours;

3. Outdoor exercise limited to 1 hour per day and no more than 5 kilometers from your home;
4. Shopping limited to one person per household per day and limited to 5 kilometers;
5. Reduction in workforce of industries, markets and companies.

#### *Treatment and outcomes definition*

An antiviral agent refers to any agent(s) prescribed to treat or prevent viral infections by interfering with the viral replication cycle. Examples of antivirals include neuraminidase inhibitors (e.g., oseltamivir), ribavirin, acyclovir, remdesevir and lopinavir/ritonavir (note that other examples exist). Topical preparations are not included.

Viral pneumonitis was defined as pneumonia (pneumonitis) that is believed to occur as a direct consequence of an infecting virus/infecting viruses. Viral pneumonitis may be a clinical diagnosis, with or without radiographic or histopathological evidence of lung consolidation. Although preferred, identification of the infecting viral species is not essential to make the diagnosis. Bacterial pneumonia was defined as pneumonia (pneumonitis) that is believed to occur as a direct consequence of infecting bacteria. It is an acute infection of the lung parenchyma caused by bacteria (e.g., *Streptococcus pneumoniae*, *Haemophilus influenzae*, *Chlamydia pneumoniae*, *Mycoplasma pneumoniae*, and *Legionella pneumophila*). Signs and symptoms include productive cough, fever, chills, shortness of breath, and chest pain. Bacterial pneumonia may be a clinical diagnosis, with or without radiographic or histopathological evidence of

lung consolidation. Although preferred, identification of the infecting bacterial species is not essential to make the diagnosis.

**eTable 1 - Sites Participating in the Study**

|                                         | <b>Number of<br/>Patients</b> |
|-----------------------------------------|-------------------------------|
| Alfred Hospital ICU                     | 19                            |
| Angliss Hospital                        | 1                             |
| Austin Hospital ICU                     | 17                            |
| Box Hill Hospital ICU                   | 2                             |
| Cabrini Hospital ICU                    | 5                             |
| Canberra Hospital ICU                   | 1                             |
| Casey Hospital ICU                      | 4                             |
| Concord Hospital (Sydney) ICU           | 2                             |
| Dandenong Hospital ICU                  | 12                            |
| Epworth Hospital (Richmond) ICU         | 5                             |
| Footscray Hospital ICU                  | 18                            |
| Frankston Hospital ICU                  | 2                             |
| Gold Coast University Hospital ICU      | 2                             |
| John Hunter Hospital ICU                | 6                             |
| Launceston General Hospital ICU         | 1                             |
| Monash Medical Centre                   | 6                             |
| Nepean Hospital ICU                     | 6                             |
| Princess Alexandra Hospital ICU         | 3                             |
| Redcliffe Hospital ICU                  | 1                             |
| Royal Adelaide Hospital ICU             | 4                             |
| Royal Brisbane and Women's Hospital ICU | 3                             |
| Royal Melbourne Hospital ICU            | 43                            |
| Royal North Shore Hospital ICU          | 9                             |
| Royal Prince Alfred Hospital ICU        | 44                            |
| St George Hospital (Sydney) ICU         | 6                             |
| St Vincent's Hospital (Melbourne) ICU   | 19                            |
| St Vincent's Hospital (Sydney) ICU      | 1                             |
| Sunshine Hospital ICU                   | 24                            |
| The Prince Charles Hospital ICU         | 1                             |
| Westmead Hospital ICU                   | 7                             |
| <b>Total</b>                            | <b>274</b>                    |

**eTable 2 - Measurement Tools Used at 6-Month Follow-Up**

| Tool           | Description                                            | Domain                     | Scoring                                                                                                                                                                                                                                             |
|----------------|--------------------------------------------------------|----------------------------|-----------------------------------------------------------------------------------------------------------------------------------------------------------------------------------------------------------------------------------------------------|
| WHODAS 2.0 12L | Global health and disability                           | Disability                 | Total score 0-48, converted to a percentage (0-100%)<br>Disability: WHODAS $\geq$ 25%<br>New disability: increase in 10% from baseline WHODAS<br>Categories: no (< 5%), mild (5-24%), moderate (25-49%), severe (50-95%) and complete ( $\geq$ 96%) |
| Return to work | Did not return to work due to health                   | WHODAS - work              | Yes / No                                                                                                                                                                                                                                            |
| EQ5D-5L        | Health status                                          | HRQoL                      | Utility score -0.6 to +1 (UK crosswalk)<br>Visual analogue score 0-100<br>Domains: No problem = 1; Extreme problem = 5<br>New problems: Score of the specific component at 6 months was higher than at baseline.                                    |
| HADS           | Subjective report of anxiety and depression            | Psychological function     | Total score of 0 (none) to 21 (severe) for each of the two subscales. Subscale scores $\geq$ 8 indicate clinically significant anxiety or depression                                                                                                |
| IES-6          | Subjective report of stress caused by traumatic events | Psychological function     | 6 questions screening for PTSD<br>Mean scores $\geq$ 1.75 indicated high risk of PTSD                                                                                                                                                               |
| MoCA-Blind     | Montreal Cognitive Assessment to screen cognition      | Cognitive function         | Includes memory, attention, language, abstraction, delayed recall and orientation.<br>Total score of 22<br>MoCA-Blind < 18 indicate impaired cognition                                                                                              |
| IADL           | Instrumental activities of daily living                | Activities of daily living | Score 0-8<br>Fully independent = 8                                                                                                                                                                                                                  |

Abbreviations: WHODAS: The World Health Organization Disability Assessment Schedule 2.0 12 level; HADS: Hospital Anxiety and Depression Scale; IES-6: Impact of Events Scale – 6 questions; MoCA-Blind: Montreal Cognitive Assessment Score – Blind; IADL: Instrumental activities of Daily Living;

**eTable 3 - Baseline Characteristics and Clinical Outcomes of the Included Patients According to 6-Month Outcome**

|                                            | Responders <sup>a</sup><br>(n = 115) | Non-Responders<br>(n = 54) | Deceased<br>(n = 43) | p value <sup>b</sup> | p value <sup>c</sup> |
|--------------------------------------------|--------------------------------------|----------------------------|----------------------|----------------------|----------------------|
| Age, years                                 | 58 (51 - 69)                         | 53 (40 - 66)               | 72 (64 - 75.6)       | 0.067                | < 0.001              |
| < 60                                       | 62 (53.9)                            | 32 (59.3)                  | 5 (11.6)             |                      |                      |
| 60 - 69                                    | 28 (24.3)                            | 11 (20.4)                  | 15 (34.9)            | 0.738                | < 0.001              |
| 70 - 79                                    | 23 (20.0)                            | 9 (16.7)                   | 16 (37.2)            |                      |                      |
| > 80                                       | 2 (1.7)                              | 2 (3.7)                    | 7 (16.3)             |                      |                      |
| Male gender - no. (%)                      | 66 (57.4)                            | 29 (53.7)                  | 29 (67.4)            | 0.740                | 0.386                |
| APACHE II                                  | 13.0 (10.0 - 16.8)                   | 12 (8 - 17)                | 19.0 (17.0 - 23.5)   | 0.702                | < 0.001              |
| Days between symptoms - hospital admission | 7.1 (4.3 - 9.4)                      | 5.5 (4.2 - 9.2)            | 3.9 (2.4 - 7.3)      | 0.290                | 0.004                |
| Days between symptoms - ICU admission      | 8.6 (6.1 - 11.1)                     | 7.6 (5.3 - 11.0)           | 6.6 (4.1 - 9.7)      | 0.323                | 0.031                |
| Body mass index, kg/m <sup>2</sup>         | 29.9 (25.7 - 35.9)                   | 27.9 (24.4 - 34.6)         | 30.2 (25.0 - 34.6)   | 0.182                | 0.399                |
| Clinical frailty score                     | 2 (2 - 3)                            | 3 (2 - 3)                  | 3 (3 - 4)            | 0.789                | < 0.001              |
| Years of education                         | 14 (11 - 16)                         | ---                        | ---                  | ---                  | ---                  |
| Healthcare worker - no. (%)                | 14 (13.0)                            | 9 (16.7)                   | 1 (2.3)              | 0.634                | 0.055                |
| Co-existing disorders - no. (%)            |                                      |                            |                      |                      |                      |
| Diabetes                                   | 35 (32.1)                            | 12 (22.2)                  | 20 (46.5)            | 0.205                | 0.044                |
| Obesity                                    | 34 (31.8)                            | 13 (25.5)                  | 13 (31.0)            | 0.461                | 0.733                |
| Use of ACEi or ARB                         | 19 (18.3)                            | 7 (13.5)                   | 12 (28.6)            | 0.503                | 0.169                |
| Chronic cardiac failure                    | 12 (11.1)                            | 6 (11.5)                   | 17 (40.5)            | 0.999                | < 0.001              |
| Smoker                                     | 10 (9.5)                             | 7 (13.7)                   | 8 (19.5)             | 0.425                | 0.255                |
| Chronic pulmonary disease**                | 5 (4.6)                              | 2 (4.0)                    | 9 (20.9)             | 0.999                | 0.005                |
| Asthma                                     | 13 (12.0)                            | 10 (19.6)                  | 5 (11.6)             | 0.231                | 0.412                |
| Immunosuppression                          | 12 (11.1)                            | 4 (7.7)                    | 8 (19.0)             | 0.585                | 0.235                |
| Chronic kidney disease                     | 5 (4.6)                              | 2 (3.8)                    | 7 (16.3)             | 0.999                | 0.046                |
| Chronic hematological disease              | 3 (2.8)                              | 1 (1.9)                    | 5 (11.9)             | 0.999                | 0.039                |
| Cancer                                     | 4 (3.7)                              | 1 (1.9)                    | 7 (16.3)             | 0.999                | 0.008                |
| Symptoms - no. (%)                         |                                      |                            |                      |                      |                      |
| Fever                                      | 86 (80.4)                            | 41 (75.9)                  | 32 (74.4)            | 0.543                | 0.657                |
| Cough                                      | 77 (72.0)                            | 35 (64.8)                  | 31 (72.1)            | 0.369                | 0.623                |
| Shortness of breath                        | 72 (67.3)                            | 36 (66.7)                  | 27 (62.8)            | 0.999                | 0.869                |
| Fatigue                                    | 57 (53.3)                            | 27 (50.0)                  | 22 (51.2)            | 0.740                | 0.930                |
| Myalgia                                    | 51 (47.7)                            | 10 (18.5)                  | 12 (27.9)            | < 0.001              | 0.001                |
| Diarrhea                                   | 29 (27.1)                            | 17 (31.5)                  | 13 (30.2)            | 0.583                | 0.786                |
| Sore throat                                | 27 (25.2)                            | 11 (20.4)                  | 8 (18.6)             | 0.559                | 0.662                |
| Anosmia                                    | 12 (11.2)                            | 6 (11.1)                   | 4 (9.3)              | 0.999                | 0.999                |
| Runny nose                                 | 12 (11.2)                            | 5 (9.3)                    | 5 (11.6)             | 0.792                | 0.912                |
| Signs at baseline                          |                                      |                            |                      |                      |                      |
| Heart rate, bpm                            | 97 (85 - 109)                        | 105 (90 - 118)             | 100 (88 - 113)       | 0.038                | 0.100                |
| Respiratory rate, breaths/min              | 30 (24 - 38)                         | 30 (24 - 40)               | 28 (21 - 38)         | 0.681                | 0.628                |
| Mean arterial pressure, mmHg               | 80 (69 - 97)                         | 76 (69 - 94)               | 84 (71 - 97)         | 0.490                | 0.488                |
| Temperature, °C                            | 38.2 (37.5 - 38.9)                   | 38.4 (37.3 - 39.1)         | 38.0 (37.4 - 38.8)   | 0.335                | 0.446                |
| SpO <sub>2</sub> , %                       | 92 (88 - 95)                         | 92 (89 - 95)               | 92 (84 - 95)         | 0.502                | 0.388                |
| Clinical outcomes                          |                                      |                            |                      |                      |                      |

**eTable 3 - Baseline Characteristics and Clinical Outcomes of the Included Patients According to 6-Month Outcome**

|                                | Responders <sup>a</sup><br>(n = 115) | Non-Responders<br>(n = 54) | Deceased<br>(n = 43) | p value <sup>b</sup> | p value <sup>c</sup> |
|--------------------------------|--------------------------------------|----------------------------|----------------------|----------------------|----------------------|
| Hospital readmission - no. (%) | 18 (17.0)                            | 0 (0.0)                    | ---                  | 0.999                | ---                  |
| Duration of ventilation, days  | 12.0 (5.0 - 16.0)                    | 8.0 (5.5 - 16.5)           | 16.0 (6.5 - 20.5)    | 0.905                | 0.329                |
| ICU length of stay, days       | 6.5 (3.1 - 16.1)                     | 4.7 (2.6 - 10.8)           | 12.9 (6.0 - 21.7)    | 0.227                | 0.005                |
| Hospital length of stay, days  | 17.2 (10.1 - 33.0)                   | 12.9 (8.2 - 23.0)          | 16.1 (9.9 - 24.2)    | 0.125                | 0.257                |
| ICU mortality - no. (%)        | 0 (0.0)                              | 0 (0.0)                    | 39 (90.7)            | ---                  | < 0.001              |
| Hospital mortality - no. (%)   | 0 (0.0)                              | 0 (0.0)                    | 42 (97.7)            | ---                  | < 0.001              |

Data are median (quartile 25% - quartile 75%) or No (%). Percentages may not total 100 because of rounding.

Abbreviations: APACHE: Acute Physiology and Chronic Health Evaluation; ACEi: angiotensin converting enzyme inhibitor; ARB: angiotensin II receptor blocker; ICU: intensive care unit.

<sup>a</sup> The follow-up cohort comprises patients who were contacted successfully at 6 months. However, data may be missing for some outcomes depending on the willingness of the patient to answer all questions.

<sup>b</sup> p value for the comparison of responders vs. non-responders.

<sup>c</sup> p value for the comparison of the three groups.

\* On a scale from 1 to 10 (1 would be the lowest level of financial distress).

\*\* Not considering asthma.

**eTable 4 - Interventions and Development of Complications in the Included Patients**

|                                            | Hospital Cohort<br>(n = 212) | Follow-Up Cohort <sup>a</sup><br>(n = 160) |
|--------------------------------------------|------------------------------|--------------------------------------------|
| Scales                                     |                              |                                            |
| MRC MMT-SS at ICU discharge                | 48 (34 - 60)                 | 48 (29 - 60)                               |
| ICU acquired weakness - no. (%)            | 58 / 137 (42.3)              | 51 (49.5)                                  |
| Highest ICU mobility scale while in ICU    | 5 (3 - 8)                    | 5 (2 - 8)                                  |
| Interventions - no. (%)                    |                              |                                            |
| Drugs                                      |                              |                                            |
| Antibiotics                                | 188 / 205 (91.7)             | 140 / 153 (91.5)                           |
| Bacteria identified during hospitalization | 45 / 193 (23.3)              | 33 / 143 (23.1)                            |
| Steroids                                   | 147 / 205 (71.7)             | 108 / 153 (70.6)                           |
| Hydroxychloroquine                         | 15 / 205 (7.3)               | 13 / 153 (8.5)                             |
| Oseltamivir                                | 0 / 205 (0.0)                | 0 / 153 (0.0)                              |
| Lopinavir-Ritonavir                        | 7 / 205 (3.4)                | 7 / 153 (4.6)                              |
| Remdesevir                                 | 64 / 212 (30.2)              | 44 / 160 (27.5)                            |
| Organ support*                             |                              |                                            |
| High-flow nasal cannula                    | 129 / 206 (62.6)             | 93 / 155 (60.0)                            |
| Non-invasive ventilation                   | 29 / 203 (14.3)              | 21 / 152 (13.8)                            |
| Mechanical ventilation                     | 120 / 210 (57.1)             | 98 / 159 (61.6)                            |
| Inotropic or vasopressor                   | 112 / 203 (55.2)             | 91 / 152 (59.9)                            |
| Neuromuscular blocking agent               | 91 / 203 (44.8)              | 76 / 152 (50.0)                            |
| Prone positioning                          | 78 / 203 (38.4)              | 61 / 152 (40.1)                            |
| Renal replacement therapy                  | 28 / 203 (13.8)              | 25 / 152 (16.4)                            |
| Other cardiac procedures                   | 13 / 203 (6.4)               | 13 / 152 (8.6)                             |
| Tracheostomy                               | 21 / 203 (10.3)              | 15 / 152 (9.9)                             |
| Inhaled nitric oxide                       | 13 / 203 (6.4)               | 13 / 152 (8.6)                             |
| Extracorporeal membrane oxygenation        | 7 / 203 (3.4)                | 7 / 152 (4.6)                              |
| Development of complications - no. (%)     |                              |                                            |
| Viral pneumonitis                          | 128 / 203 (63.1)             | 95 / 151 (62.9)                            |
| Bacterial pneumonia                        | 47 / 196 (24.0)              | 35 / 146 (24.0)                            |
| Bacteremia                                 | 22 / 199 (11.1)              | 19 / 148 (12.8)                            |
| Stroke                                     | 1 / 204 (0.5)                | 1 / 153 (0.7)                              |
| Arrhythmia                                 | 30 / 204 (14.7)              | 23 / 153 (15.0)                            |
| Barotrauma**                               | 10 / 204 (4.9)               | 9 / 153 (5.9)                              |
| Cardiac arrest                             | 2 / 204 (1.0)                | 2 / 153 (1.3)                              |
| Pulmonary embolism                         | 9 / 197 (4.6)                | 6 / 147 (4.1)                              |
| Deep vein thrombosis                       | 12 / 197 (6.1)               | 11 / 147 (7.5)                             |
| Myocarditis                                | 19 / 196 (9.7)               | 16 / 147 (10.9)                            |

Data are median (quartile 25% - quartile 75%) or No (%). Percentages may not total 100 because of rounding.

<sup>a</sup> The follow-up cohort comprises patients who died within 6 months or who were contacted successfully at 6 months. However, data may be missing for some outcomes depending on the willingness of the patient to answer all questions.

\* Assessed daily until ICU discharge

\*\* Defined as pneumothorax or pneumomediastinum or subcutaneous emphysema on chest X-ray or CT chest

**eTable 5 - Interventions and Development of Complications in the Included Patients According to 6-Month Outcome**

|                                            | Responders <sup>a</sup><br>(n = 115) | Non-Responders<br>(n = 54) | Deceased<br>(n = 43) | p value <sup>b</sup> | p value <sup>c</sup> |
|--------------------------------------------|--------------------------------------|----------------------------|----------------------|----------------------|----------------------|
| Scales                                     |                                      |                            |                      |                      |                      |
| MRC MMT-SS at ICU discharge                | 49 (42 - 60)                         | 60 (48 - 60)               | 0 (0 - 8)            | 0.166                | < 0.001              |
| ICU acquired weakness - no. (%)            | 29 / 76 (38.2)                       | 9 / 36 (25.0)              | 20 / 25 (80.0)       | 0.203                | < 0.001              |
| Highest ICU mobility scale while in ICU    | 6 (5 - 8)                            | 6 (3 - 9)                  | 0 (0 - 2)            | 0.420                | < 0.001              |
| Interventions - no. (%)                    |                                      |                            |                      |                      |                      |
| Drugs                                      |                                      |                            |                      |                      |                      |
| Antibiotics                                | 96 (88.9)                            | 50 (92.6)                  | 42 (97.7)            | 0.582                | 0.212                |
| Bacteria identified during hospitalization | 18 (18.4)                            | 13 (25.0)                  | 14 (32.6)            | 0.495                | 0.171                |
| Steroids                                   | 73 (67.6)                            | 40 (74.1)                  | 34 (79.1)            | 0.470                | 0.359                |
| Hydroxychloroquine                         | 7 (6.5)                              | 2 (3.7)                    | 6 (14.0)             | 0.719                | 0.163                |
| Oseltamivir                                | 0 (0.0)                              | 0 (0.0)                    | 0 (0.0)              | ---                  | ---                  |
| Lopinavir-Ritonavir                        | 5 (4.6)                              | 0 (0.0)                    | 2 (4.7)              | 0.170                | 0.230                |
| Remdesevir                                 | 36 (31.3)                            | 21 (38.9)                  | 7 (16.3)             | 0.384                | 0.047                |
| Organ support*                             |                                      |                            |                      |                      |                      |
| High-flow nasal cannula                    | 67 (60.9)                            | 37 (69.8)                  | 25 (58.1)            | 0.300                | 0.435                |
| Non-invasive ventilation                   | 12 (11.2)                            | 8 (15.1)                   | 9 (20.9)             | 0.612                | 0.294                |
| Mechanical ventilation                     | 57 (50.0)                            | 24 (45.3)                  | 39 (90.7)            | 0.620                | < 0.001              |
| Inotropic or vasopressor                   | 52 (48.6)                            | 22 (41.5)                  | 38 (88.4)            | 0.406                | < 0.001              |
| Neuromuscular blocking agent               | 40 (37.4)                            | 16 (30.2)                  | 35 (81.4)            | 0.386                | < 0.001              |
| Prone positioning                          | 38 (35.5)                            | 18 (34.0)                  | 22 (51.2)            | 0.999                | 0.157                |
| Renal replacement therapy                  | 12 (11.2)                            | 3 (5.7)                    | 13 (30.2)            | 0.389                | 0.003                |
| Other cardiac procedures                   | 8 (7.5)                              | 0 (0.0)                    | 5 (11.6)             | 0.053                | 0.029                |
| Tracheostomy                               | 9 (8.4)                              | 7 (13.2)                   | 5 (11.6)             | 0.404                | 0.557                |
| Inhaled nitric oxide                       | 7 (6.5)                              | 0 (0.0)                    | 6 (14.0)             | 0.096                | 0.015                |
| Extracorporeal membrane oxygenation        | 4 (3.7)                              | 0 (0.0)                    | 3 (7.0)              | 0.303                | 0.135                |
| Development of complications - no. (%)     |                                      |                            |                      |                      |                      |
| Viral pneumonitis                          | 66 (62.3)                            | 34 (63.0)                  | 28 (65.1)            | 0.999                | 0.981                |
| Bacterial pneumonia                        | 19 (18.4)                            | 12 (23.1)                  | 16 (39.0)            | 0.527                | 0.037                |
| Bacteremia                                 | 10 (9.5)                             | 4 (7.5)                    | 8 (19.5)             | 0.775                | 0.169                |
| Stroke                                     | 0 (0.0)                              | 0 (0.0)                    | 1 (2.3)              | ---                  | 0.211                |
| Arrhythmia                                 | 12 (11.1)                            | 7 (13.2)                   | 11 (25.6)            | 0.796                | 0.092                |
| Barotrauma**                               | 5 (4.6)                              | 2 (3.8)                    | 3 (7.0)              | 0.999                | 0.758                |
| Cardiac arrest                             | 0 (0.0)                              | 0 (0.0)                    | 2 (4.7)              | ---                  | 0.044                |
| Pulmonary embolism                         | 4 (3.8)                              | 3 (5.8)                    | 2 (4.9)              | 0.687                | 0.902                |
| Deep vein thrombosis                       | 8 (7.7)                              | 1 (1.9)                    | 3 (7.3)              | 0.273                | 0.347                |
| Myocarditis                                | 7 (6.7)                              | 3 (5.9)                    | 9 (22.0)             | 0.999                | 0.022                |

Data are median (quartile 25% - quartile 75%) or No (%). Percentages may not total 100 because of rounding.

<sup>a</sup> The follow-up cohort comprises patients who were contacted successfully at 6 months. However, data may be missing for some outcomes depending on the willingness of the patient to answer all questions.

<sup>b</sup> p value for the comparison of responders vs. non-responders.

<sup>c</sup> p value for the comparison of the three groups.

\* Assessed daily until ICU discharge

\*\* Defined as pneumothorax or pneumomediastinum or subcutaneous emphysema on chest X-ray or CT chest

**eTable 6 - WHODAS Components at 6 Months in Patients Included**

|                                                                     | Follow-Up Cohort <sup>a</sup><br>(n = 115) | New Disability  |                | p value |
|---------------------------------------------------------------------|--------------------------------------------|-----------------|----------------|---------|
|                                                                     |                                            | Yes<br>(n = 42) | No<br>(n = 66) |         |
| Standing for long periods such as 30 minutes                        |                                            |                 |                | < 0.001 |
| None                                                                | 68 (60.2)                                  | 15 (35.7)       | 51 (77.3)      |         |
| Mild                                                                | 17 (15.0)                                  | 8 (19.0)        | 7 (10.6)       |         |
| Moderate                                                            | 17 (15.0)                                  | 12 (28.6)       | 5 (7.6)        |         |
| Severe                                                              | 4 (3.5)                                    | 3 (7.1)         | 1 (1.5)        |         |
| Extreme or cannot do                                                | 7 (6.2)                                    | 4 (9.5)         | 2 (3.0)        |         |
| Taking care of your household responsibilities                      |                                            |                 |                | < 0.001 |
| None                                                                | 77 (68.1)                                  | 13 (31.0)       | 61 (92.4)      |         |
| Mild                                                                | 14 (12.4)                                  | 9 (21.4)        | 4 (6.1)        |         |
| Moderate                                                            | 17 (15.0)                                  | 16 (38.1)       | 1 (1.5)        |         |
| Severe                                                              | 3 (2.7)                                    | 3 (7.1)         | 0 (0.0)        |         |
| Extreme or cannot do                                                | 2 (1.8)                                    | 1 (2.4)         | 0 (0.0)        |         |
| Learning a new task                                                 |                                            |                 |                | 0.001   |
| None                                                                | 94 (83.2)                                  | 28 (66.7)       | 62 (93.9)      |         |
| Mild                                                                | 10 (8.8)                                   | 7 (16.7)        | 3 (4.5)        |         |
| Moderate                                                            | 8 (7.1)                                    | 6 (14.3)        | 1 (1.5)        |         |
| Severe                                                              | 1 (0.9)                                    | 1 (2.4)         | 0 (0.0)        |         |
| Joining in community activities in the same way as anyone else can? |                                            |                 |                | < 0.001 |
| None                                                                | 81 (71.7)                                  | 16 (38.1)       | 61 (92.4)      |         |
| Mild                                                                | 12 (10.6)                                  | 11 (26.2)       | 1 (1.5)        |         |
| Moderate                                                            | 11 (9.7)                                   | 8 (19.0)        | 3 (4.5)        |         |
| Severe                                                              | 4 (3.5)                                    | 4 (9.5)         | 0 (0.0)        |         |
| Extreme or cannot do                                                | 5 (4.4)                                    | 3 (7.1)         | 1 (1.5)        |         |
| Emotionally affected by your health problems                        |                                            |                 |                | < 0.001 |
| None                                                                | 38 (33.6)                                  | 5 (11.9)        | 32 (48.5)      |         |
| Mild                                                                | 31 (27.4)                                  | 10 (23.8)       | 20 (30.3)      |         |
| Moderate                                                            | 27 (23.9)                                  | 15 (35.7)       | 11 (16.7)      |         |
| Severe                                                              | 13 (11.5)                                  | 10 (23.8)       | 2 (3.0)        |         |
| Extreme or cannot do                                                | 4 (3.5)                                    | 2 (4.8)         | 1 (1.5)        |         |
| Concentrating on doing something for ten minutes                    |                                            |                 |                | 0.015   |
| None                                                                | 83 (73.5)                                  | 25 (59.5)       | 55 (83.3)      |         |
| Mild                                                                | 17 (15.0)                                  | 9 (21.4)        | 8 (12.1)       |         |
| Moderate                                                            | 9 (8.0)                                    | 5 (11.9)        | 3 (4.5)        |         |
| Severe                                                              | 4 (3.5)                                    | 3 (7.1)         | 0 (0.0)        |         |
| Walking a long distance such as a kilometer                         |                                            |                 |                | < 0.001 |
| None                                                                | 57 (50.4)                                  | 9 (21.4)        | 45 (68.2)      |         |
| Mild                                                                | 15 (13.3)                                  | 7 (16.7)        | 8 (12.1)       |         |
| Moderate                                                            | 14 (12.4)                                  | 7 (16.7)        | 6 (9.1)        |         |
| Severe                                                              | 10 (8.8)                                   | 8 (19.0)        | 2 (3.0)        |         |
| Extreme or cannot do                                                | 17 (15.0)                                  | 11 (26.2)       | 5 (7.6)        |         |

**eTable 6 - WHODAS Components at 6 Months in Patients Included**

|                                     | Follow-Up Cohort <sup>a</sup><br>(n = 115) | New Disability  |                | p value |
|-------------------------------------|--------------------------------------------|-----------------|----------------|---------|
|                                     |                                            | Yes<br>(n = 42) | No<br>(n = 66) |         |
| Washing your whole body             |                                            |                 |                | < 0.001 |
| None                                | 99 (88.4)                                  | 31 (73.8)       | 65 (98.5)      |         |
| Mild                                | 6 (5.4)                                    | 5 (11.9)        | 1 (1.5)        |         |
| Moderate                            | 3 (2.7)                                    | 3 (7.1)         | 0 (0.0)        |         |
| Severe                              | 3 (2.7)                                    | 3 (7.1)         | 0 (0.0)        |         |
| Extreme or cannot do                | 1 (0.9)                                    | 0 (0.0)         | 0 (0.0)        |         |
| Getting dressed                     |                                            |                 |                | 0.001   |
| None                                | 94 (83.9)                                  | 29 (69.0)       | 62 (93.9)      |         |
| Mild                                | 12 (10.7)                                  | 9 (21.4)        | 3 (4.5)        |         |
| Moderate                            | 3 (2.7)                                    | 3 (7.1)         | 0 (0.0)        |         |
| Severe                              | 1 (0.9)                                    | 1 (2.4)         | 0 (0.0)        |         |
| Extreme or cannot do                | 2 (1.8)                                    | 0 (0.0)         | 1 (1.5)        |         |
| Dealing with people you do not know |                                            |                 |                | 0.001   |
| None                                | 96 (85.0)                                  | 29 (69.0)       | 63 (95.5)      |         |
| Mild                                | 7 (6.2)                                    | 5 (11.9)        | 2 (3.0)        |         |
| Moderate                            | 5 (4.4)                                    | 4 (9.5)         | 1 (1.5)        |         |
| Severe                              | 3 (2.7)                                    | 3 (7.1)         | 0 (0.0)        |         |
| Extreme or cannot do                | 2 (1.8)                                    | 1 (2.4)         | 0 (0.0)        |         |
| Maintaining a friendship            |                                            |                 |                | 0.003   |
| None                                | 102 (91.1)                                 | 34 (81.0)       | 65 (98.5)      |         |
| Mild                                | 4 (3.6)                                    | 3 (7.1)         | 1 (1.5)        |         |
| Moderate                            | 2 (1.8)                                    | 2 (4.8)         | 0 (0.0)        |         |
| Severe                              | 3 (2.7)                                    | 3 (7.1)         | 0 (0.0)        |         |
| Extreme or cannot do                | 1 (0.9)                                    | 0 (0.0)         | 0 (0.0)        |         |
| Your day-to-day work/school         |                                            |                 |                | < 0.001 |
| None                                | 70 (61.9)                                  | 8 (19.0)        | 58 (87.9)      |         |
| Mild                                | 15 (13.3)                                  | 12 (28.6)       | 3 (4.5)        |         |
| Moderate                            | 12 (10.6)                                  | 8 (19.0)        | 4 (6.1)        |         |
| Severe                              | 4 (3.5)                                    | 4 (9.5)         | 0 (0.0)        |         |
| Extreme or cannot do                | 12 (10.6)                                  | 10 (23.8)       | 1 (1.5)        |         |

<sup>a</sup> The follow-up cohort comprises patients who were contacted successfully at 6 months. However, data may be missing for some outcomes depending on the willingness of the patient to answer all questions.

**eTable 7 - Analyses of Factors Associated with Development of New Disability or Death at 6 Months**

|                                      | Univariable analyses   |                | Full multivariable analysis* |                | Final model**          |                |
|--------------------------------------|------------------------|----------------|------------------------------|----------------|------------------------|----------------|
|                                      | Odds Ratio<br>(95% CI) | <i>p</i> value | Odds Ratio<br>(95% CI)       | <i>p</i> value | Odds Ratio<br>(95% CI) | <i>p</i> value |
| Age                                  | 1.04 (1.01 to 1.07)    | 0.010          | 1.08 (0.73 to 1.60)          | 0.705          | ---                    | ---            |
| Male gender                          | 0.79 (0.40 to 1.58)    | 0.509          | ---                          | ---            | ---                    | ---            |
| APACHE II                            | 1.11 (1.05 to 1.18)    | 0.001          | 1.21 (0.76 to 1.92)          | 0.429          | 1.08 (1.01 to 1.17)    | 0.032          |
| Body mass index                      | 1.00 (0.97 to 1.03)    | 0.937          | ---                          | ---            | ---                    | ---            |
| Clinical frailty score               | 1.70 (1.23 to 2.35)    | 0.001          | 1.52 (0.98 to 2.38)          | 0.063          | 1.49 (1.05 to 2.11)    | 0.025          |
| Years of education                   | 0.98 (0.90 to 1.07)    | 0.649          | ---                          | ---            | ---                    | ---            |
| Diabetes                             | 2.63 (1.27 to 5.47)    | 0.009          | 1.96 (0.84 to 4.56)          | 0.121          | ---                    | ---            |
| Obesity                              | 1.60 (0.74 to 3.47)    | 0.232          | ---                          | ---            | ---                    | ---            |
| Use of ACEi or ARB                   | 1.55 (0.64 to 3.74)    | 0.326          | ---                          | ---            | ---                    | ---            |
| Chronic cardiac failure              | 2.66 (1.05 to 6.73)    | 0.040          | 1.29 (0.45 to 3.73)          | 0.636          | ---                    | ---            |
| Smoker                               | 1.14 (0.41 to 3.19)    | 0.806          | ---                          | ---            | ---                    | ---            |
| Asthma                               | 1.91 (0.62 to 5.83)    | 0.259          | ---                          | ---            | ---                    | ---            |
| Immunosuppression                    | 1.34 (0.48 to 3.68)    | 0.576          | ---                          | ---            | ---                    | ---            |
| Chronic kidney disease               | 2.32 (0.59 to 9.09)    | 0.229          | ---                          | ---            | ---                    | ---            |
| Chronic hematological disease        | 1.31 (0.29 to 5.98)    | 0.727          | ---                          | ---            | ---                    | ---            |
| Cancer                               | 8.24 (1.02 to 66.80)   | 0.048          | 5.24 (0.55 to 50.00)         | 0.150          | ---                    | ---            |
| Corticosteroids                      | 1.93 (0.93 to 4.01)    | 0.078          | ---                          | ---            | ---                    | ---            |
| Use of invasive ventilation          | 1.93 (0.95 to 3.91)    | 0.069          | ---                          | ---            | ---                    | ---            |
| Use of inotropes or vasopressors     | 1.88 (0.95 to 3.71)    | 0.069          | ---                          | ---            | ---                    | ---            |
| Use of neuromuscular blocking agents | 2.83 (1.42 to 5.60)    | 0.003          | 1.94 (0.81 to 4.60)          | 0.135          | ---                    | ---            |
| Prone positioning                    | 2.22 (1.09 to 4.51)    | 0.028          | 1.67 (0.71 to 3.93)          | 0.239          | ---                    | ---            |
| Use of renal replacement therapy     | 2.19 (0.82 to 5.82)    | 0.118          | ---                          | ---            | ---                    | ---            |
| Tracheostomy                         | 1.96 (0.57 to 6.72)    | 0.284          | ---                          | ---            | ---                    | ---            |

**eTable 7 - Analyses of Factors Associated with Development of New Disability or Death at 6 Months**

|                     | Univariable analyses   |                | Full multivariable analysis* |                | Final model**          |                |
|---------------------|------------------------|----------------|------------------------------|----------------|------------------------|----------------|
|                     | Odds Ratio<br>(95% CI) | <i>p</i> value | Odds Ratio<br>(95% CI)       | <i>p</i> value | Odds Ratio<br>(95% CI) | <i>p</i> value |
| Baseline disability | 0.24 (0.03 to 2.10)    | 0.199          | ---                          | ---            | ---                    | ---            |
| Baseline WHODAS     | 0.98 (0.93 to 1.02)    | 0.338          | ---                          | ---            | ---                    | ---            |
| Week of admission   | 1.01 (0.97 to 1.05)    | 0.584          | ---                          | ---            | ---                    | ---            |

Abbreviations: APACHE: Acute Physiology and Chronic Health Evaluation; ACEi: angiotensin converting enzyme inhibitor; ARB: angiotensin II receptor blocker; NIV: non-invasive ventilation; HFNC: high-flow nasal cannula; ECMO: extracorporeal membrane oxygenation.

\* Full multivariable model forcing all variable with  $p < 0.05$  in the univariable model.

\*\* The final model was constructed using a least absolute shrinkage and selection operator approach and confirmed using a backwards elimination technique before undergoing a final assessment for clinical and biological plausibility.

**eFigure 1 - Roadmap of Restrictions in Australia During the 2020 COVID-19 Pandemic**

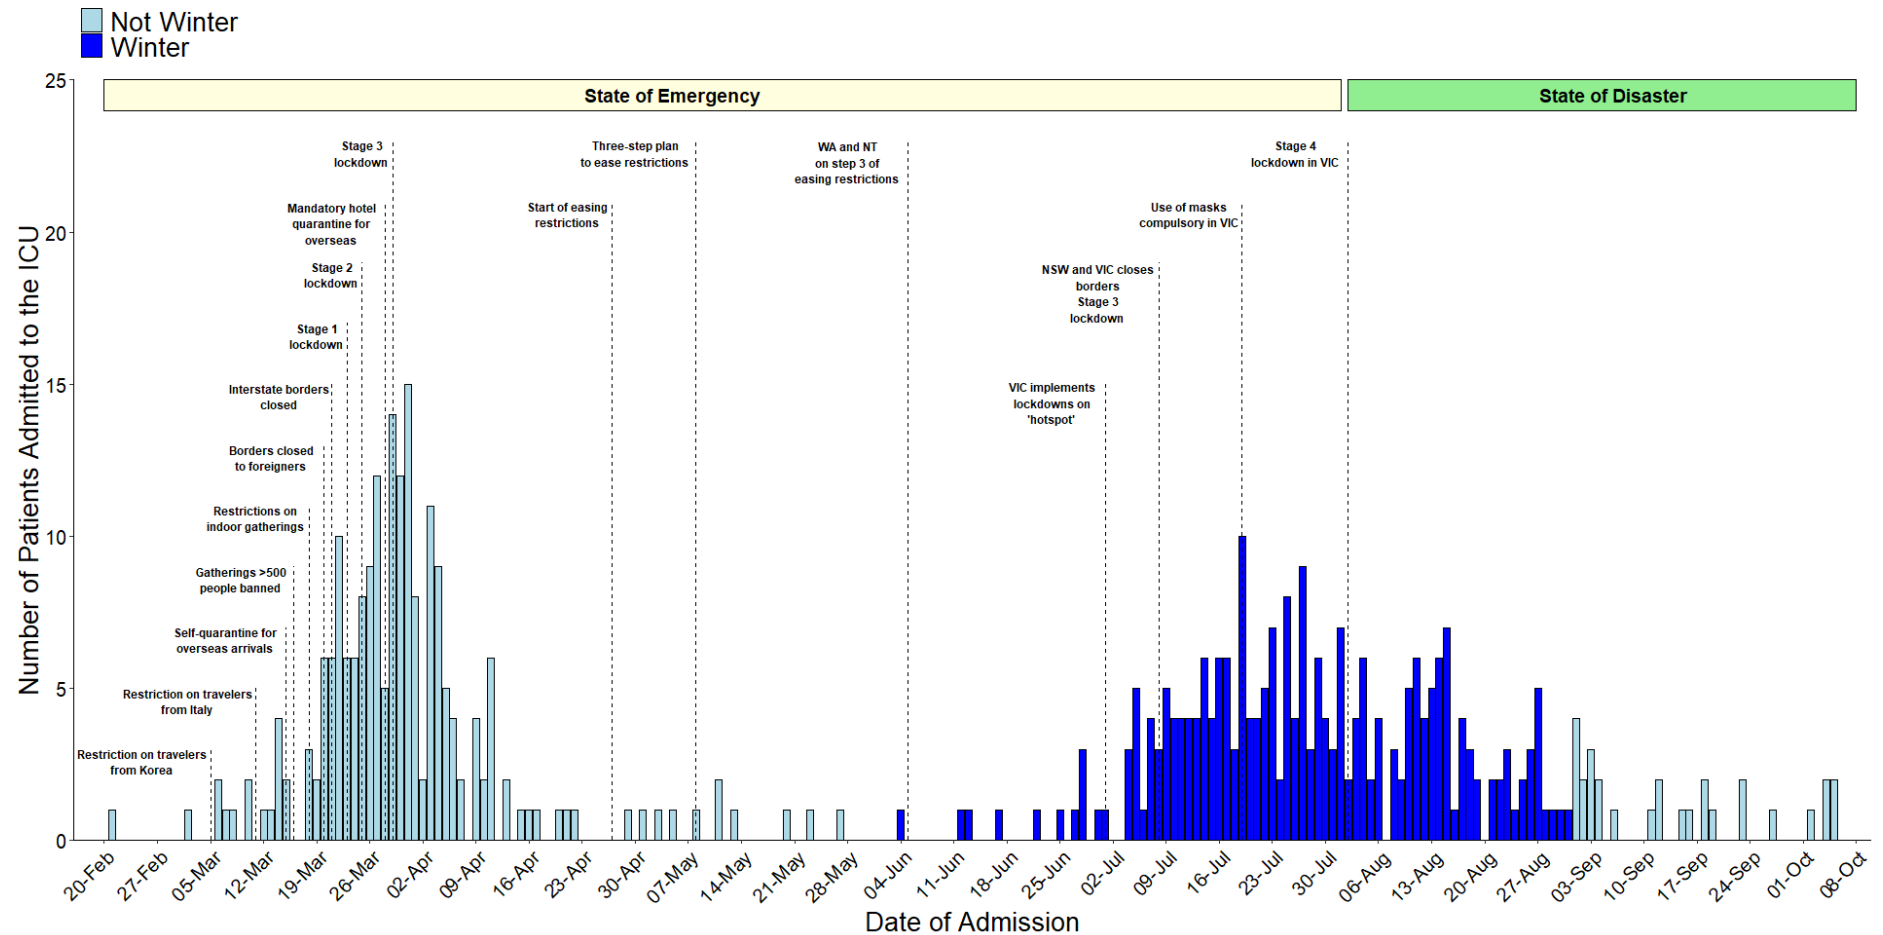

More information and definition of the stage lockdowns are available in the Additional Methods section. WA denotes Western Australia, NT Northern Territory, VIC Victoria and NSW New South Wales.

**eFigure 2. Kaplan-Meier curve of survival to day 180, including patients who received mechanical ventilation (red) and patients who were not mechanically ventilated (blue).**

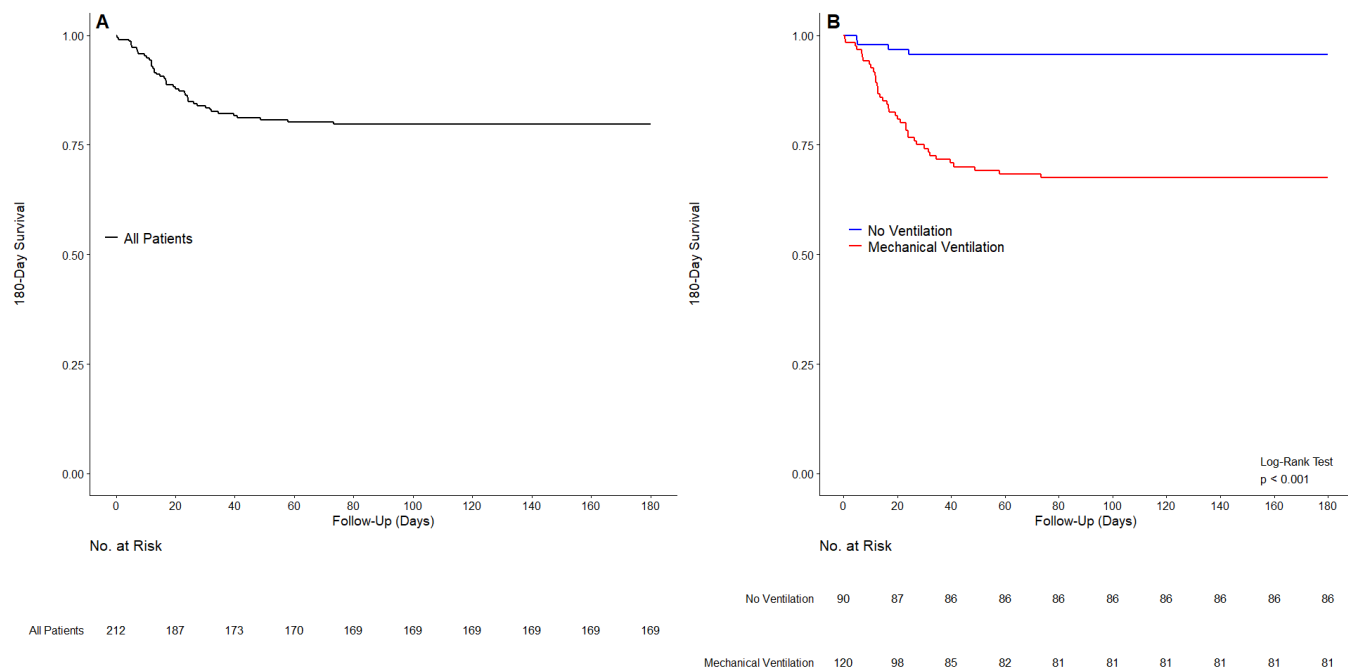

Supplement: Supplementary file 1 — Additional file 1: Electronic Supplementary Appendix to The COVID-Recovery Study. [file 13054_2021_3794_MOESM1_ESM.pdf]
